# Supplementary material
Source: PubMed Central journal article supplement (PMC6250298)
Supplement: cir-138-2263-s001.pdf [file cir-138-2263-s001.pdf]

**SUPPLEMENTAL MATERIAL**

**Supplement Table 1**

| <b>Study</b>                                          | <b>experimental groups</b> | <b>final body weight (g)</b> | <b>total cholesterol (mg/dL)</b> |
|-------------------------------------------------------|----------------------------|------------------------------|----------------------------------|
| <b>anti-BAFF /<br/>Apoe<sup>-/-</sup></b>             | <b>anti-BAFF Ab</b>        | <b>33.8 ±1.5</b>             | <b>1551 ±92</b>                  |
|                                                       | <b>Ctrl Ab</b>             | <b>34.6 ±2.2</b>             | <b>1679 ±45</b>                  |
| <b>anti-BAFF /<br/>Ldlr<sup>-/-</sup></b>             | <b>anti-BAFF Ab</b>        | <b>32.2 ±0.9</b>             | <b>1680 ±140</b>                 |
|                                                       | <b>Ctrl Ab</b>             | <b>32.3 ±0.7</b>             | <b>1727 ±112</b>                 |
| <b>Apoe<sup>-/-</sup> Taci</b>                        | <b>Taci<sup>-/-</sup></b>  | <b>29.8 ±0.8</b>             | <b>949 ±46</b>                   |
|                                                       | <b>Taci<sup>+/+</sup></b>  | <b>31.1 ±0.8</b>             | <b>933 ±39</b>                   |
| <b>Ldlr<sup>-/-</sup> Taci<br/>(myeloid-specific)</b> | <b>Taci<sup>-/-</sup></b>  | <b>31.1 ±0.9**</b>           | <b>1056 ±128</b>                 |
|                                                       | <b>Taci<sup>+/+</sup></b>  | <b>35.3 ±1.1</b>             | <b>960 ±74</b>                   |
| <b>Ldlr<sup>-/-</sup> Taci<br/>(B cell-specific)</b>  | <b>Taci<sup>-/-</sup></b>  | <b>30.2 ±0.7</b>             | <b>840 ±47</b>                   |
|                                                       | <b>Taci<sup>+/+</sup></b>  | <b>30.5 ±0.7</b>             | <b>789 ±33</b>                   |

**Supplement Table 1. Whole body weight and serum total cholesterol.** Data show body weights and total cholesterol levels determined at the end of each experiment. All results are represented as mean ± SEM.

## Supplement Figure 1

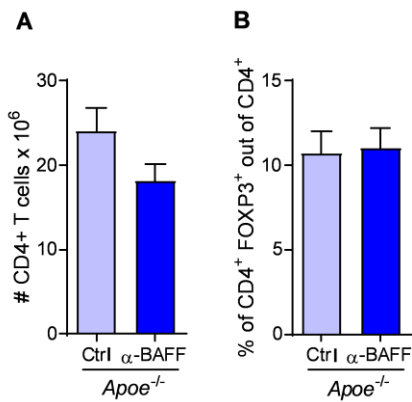

**Supplement Figure 1. Anti-BAFF antibody treatment does not alter the numbers of splenic CD4<sup>+</sup> T cells and Tregs.** Bar graphs show absolute numbers of (A) CD4<sup>+</sup> T cells (B) Treg (CD4<sup>+</sup> FOXP3<sup>+</sup>) frequency within CD4<sup>+</sup> T cells in the spleen of *Apoe*<sup>-/-</sup> mice treated with a control (Ctrl) or an anti-BAFF neutralizing antibody ( $\alpha$ -BAFF) while they were fed an atherogenic diet for 8 weeks (n=8-9 mice per group). All results show mean  $\pm$  SEM.

## Supplement Figure 2

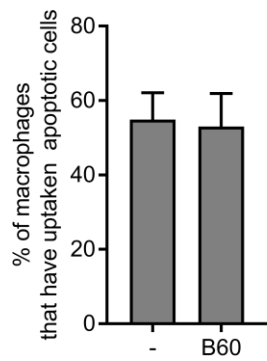

**Supplement Figure 2. BAFF stimulation does not alter the phagocytic capacity of macrophages in vitro.** Bar graph shows the mean derived from the average of quadruplicates of three independent experiments (paired t test).

### Supplement Figure 3

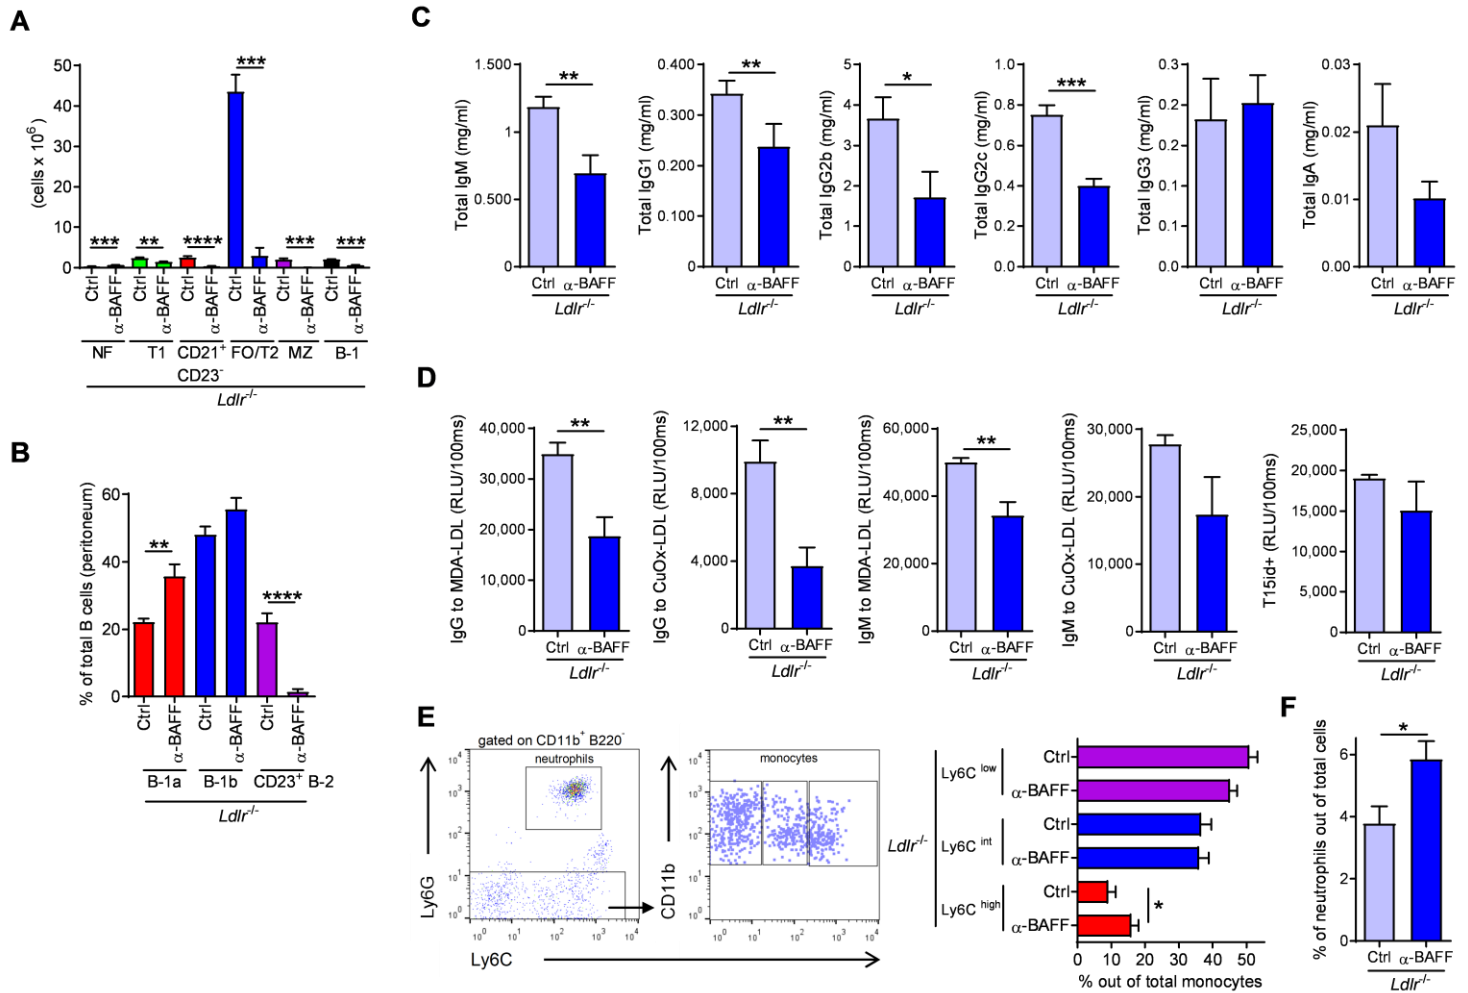

**Supplement Figure 3. Anti-BAFF antibody treatment depletes mature B cells and reduces total Ig titers in plasma in *Ldlr*<sup>-/-</sup> mice.** (A) Bar graphs show absolute numbers of FO/T2 (blue), MZ (purple), CD21<sup>+</sup>CD23<sup>-</sup> B cells (red), T1 (green), NF (grey) cells and B-1 cells (defined as B220<sup>low</sup>IgM<sup>+</sup>CD43<sup>+</sup>), (B) frequencies of peritoneal B-1a, B-1b, CD23<sup>+</sup> B-2 cells, (C) Total IgM, IgG1, IgG2b, IgG2c, IgG3 and IgA plasma antibody titers, (D) plasma levels of T15id<sup>+</sup> IgM, MDA- and CuOx-LDL specific IgG and IgM antibodies, (E) representative flow cytometry gating strategy (left) and frequencies of circulating Ly6C<sup>high</sup>, Ly6C<sup>int</sup> and Ly6C<sup>low</sup> monocytes (right) and (F) frequencies of neutrophils in peripheral blood. Data are derived from *Ldlr*<sup>-/-</sup> mice treated with a control (Ctrl) or an anti-BAFF neutralizing

antibody ( $\alpha$ -BAFF) while they were fed an atherogenic diet for 8 weeks (n=8 mice per group). All results show mean  $\pm$  SEM. \*P<0.05, \*\*P<0.01, \*\*\*P<0.001, \*\*\*\*P<0.0001 (Mann-Whitney *U* or unpaired Student *t* test).

#### Supplement Figure 4

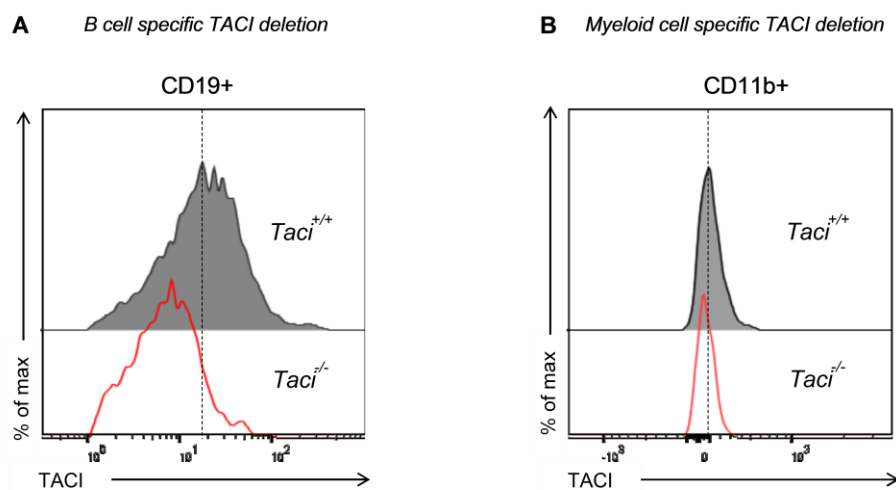

**Supplement Figure 4. Evaluation of B cell or myeloid cell specific TACI deletion of atherosclerosis studies shown in Figure 2.** (A; B cell specific TACI deletion) Histograms show mean fluorescence intensity (MFI) of surface TACI expression measured by flow cytometry in B cells (CD19<sup>+</sup>) of lethally irradiated *Ldlr*<sup>-/-</sup> mice transplanted with a mixture of 80%  $\mu$ MT (B cell deficient) with either 20% *Taci*<sup>+/+</sup> (*Taci*<sup>+/+</sup>) or 20% *Taci*<sup>-/-</sup> bone marrow (*Taci*<sup>-/-</sup>). (B; myeloid cell specific TACI deletion) Histograms show MFI of surface TACI expression measured by flow cytometry in myeloid cells (CD11b<sup>+</sup>) of lethally irradiated *Ldlr*<sup>-/-</sup> mice transplanted with a mixture of 20% C57BL/6 WT bone marrow and either 80% *Taci*<sup>+/+</sup>*Rag2*<sup>-/-</sup> (*Taci*<sup>+/+</sup>) or 80% *Taci*<sup>-/-</sup>*Rag2*<sup>-/-</sup> bone marrow (*Taci*<sup>-/-</sup>). All mice were fed an atherogenic diet for 8 weeks.

**Supplement Figure 5**

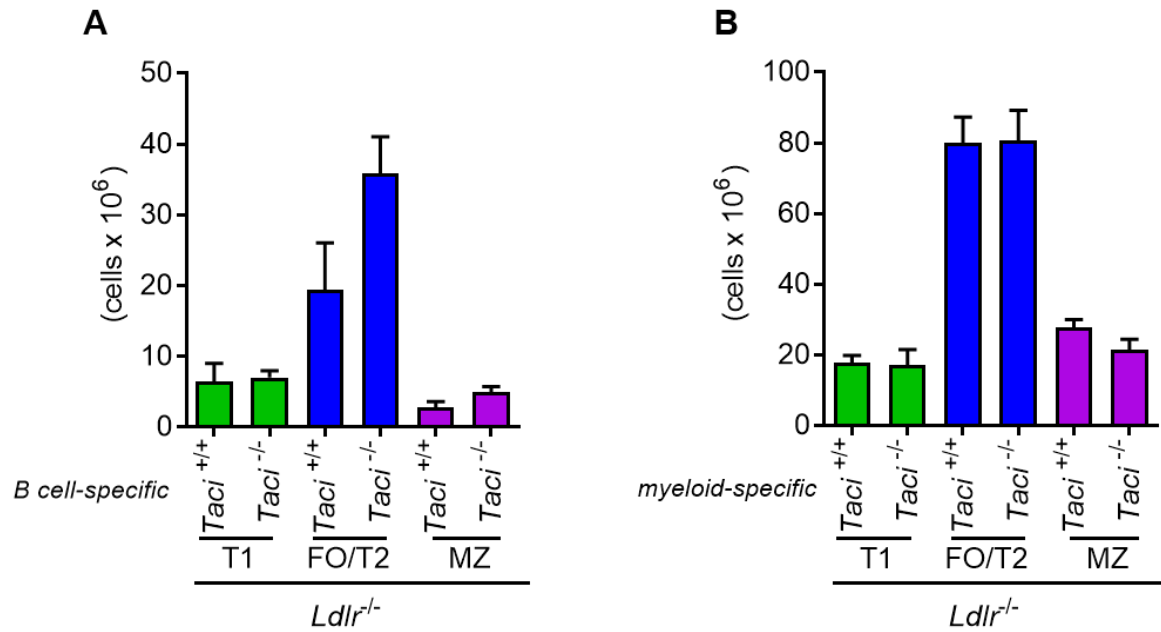

**Supplement Figure 5. TAC1 signaling does not alter splenic B cell numbers in atherosclerosis-prone mice.** Bar graphs show absolute numbers of FO/T2 (blue), MZ (purple) and T1 (green) in the spleens of lethally irradiated *Ldlr*<sup>-/-</sup> mice transplanted with a mixture of bone marrow cells made up of (B) 80%  $\mu$ MT (B cell deficient) with either 20% *Tac1*<sup>+/+</sup> (control group) or 20% *Tac1*<sup>-/-</sup> bone marrow (n=10 per group) or (C) of 20% C57BL6 WT bone marrow and either 80% *Tac1*<sup>+/+</sup>*Rag2*<sup>-/-</sup> (control group) or 80% *Tac1*<sup>-/-</sup>*Rag2*<sup>-/-</sup> bone marrow (n=13-15 per group), and were fed an atherogenic diet for 8 weeks.
